# Supplementary material for: Immune Responses Vary in Preinvasive Colorectal Lesions by Tumor Location and Histology
Source: Oxford University Press journal article supplement (doi:10.1158/1940-6207.capr-20-0592), 2021-08-02
Supplement: 19406207capr200592-sup-255359_2_supp_7083745_qs9yyy.docx [file 19406207capr200592-sup-255359_2_supp_7083745_qs9yyy.docx]

| Supplemental Table 1 | |  |  |  |  |  |  |  |
| --- | --- | --- | --- | --- | --- | --- | --- | --- |
| **Stain names** | **Staining sequence** | **Antibody (clone)** | **Host, Clonality (M=monocl., P=polycl.)** | **Vendor (Catalog #)** | **Leica Bond Epitope Retrieval (ER) (min)** | **Peroxidase Block 3% H202 in methanol (min)** |  |  |
| CD117-MICA | 1 | MICA/B (F-6) | Mouse M | Santa Cruz (SC137242) | ER 1, pH6.0 #AR9961 (20) | 10 |  |  |
|  | 2 | CD117, c-kit (YR145) | Rabbit M | Cell Marque (117R-18) | ER 1, pH6.0 #AR9961 (10) | 10 |  |  |
| CD4-RORC | 1 | CD4 (4B12) | Mouse M | Leica (NCL-L-CD4-368) | ER 2, pH9.0 #AR9640 (20) | 10 |  |  |
|  | 2 | RorC | Rabbit P | Aviva Systems Biology (ARP45622_P050) | ER 1, pH6.0 #AR9961 (10) | 10 |  |  |
| IFNg-IL6-IL17A | 1 | IL6 | Mouse M | Abcam (ab9324) | ER 1, pH6.0 #AR9961 (20) | 10 |  |  |
|  | 2 | IL17A | Goat P | R&D Biotech (AF-317-NA) | ER 1, pH6.0 #AR9961 (10) | 10 |  |  |
|  | 3 | IFNg | Rabbit P | Abcam (ab9657) | ER 1, pH6.0 #AR9961 (10) | 15 |  |  |
| **Protein Block Agilent /DAKO #X0909 (min)** | **1°Ab Dilution (1:xx)** | **1° Ab Inc. time (h)** | **2° Antibody (30 min)** | **TSA Reagent (15 min)** | **Pseudo color** | **Detection Kit** |  |  |
| 10 | 50 | 3 | EnVision+ System- HRP, Anti-mouse (Agilent/Dako #K4001) | TSA-Cy5 #SAT705A001EA5 | Red | Bond Research Detection System (Leica #DS9455) |  |  |
| 0 | RTU | 2 | EnVision+ System- HRP, Anti-Rabbit (Agilent/Dako #K4003) | TSA-Cy3 #SAT704A001EA, Perkin Elmer | Green | Bond Research Detection System (Leica #DS9455) |  |  |
| 10 | 50 | 1 | EnVision+ System- HRP, Anti-mouse (Agilent/Dako #K4001) | TSA-Cy5 #SAT705A001EA5 | Red | Bond Research Detection System (Leica #DS9455) |  |  |
| 0 | 100 | 2 | EnVision+ System- HRP, Anti-Rabbit (Agilent/Dako #K4003) | Alexa Fluor™ 488 Tyramide Reagent, # B40953, Life Technologies | Green | Bond Research Detection System (Leica #DS9455) |  |  |
| 10 | 200 | 2 | EnVision+ System- HRP, Anti-mouse (Agilent/Dako #K4001) | TSA-Cy5 #SAT705A001EA5 | Red | Bond Research Detection System (Leica #DS9455) |  |  |
| 0 | 50 | 2 | ImmPRESS HRP Anti-Goat Ig Polymer (Vector #MP-7405-50) | TSA-Cy3 #SAT704A001EA, Perkin Elmer | Green | Bond Research Detection System (Leica #DS9455) |  |  |
| 0 | 100 | 3 | EnVision+ System- HRP, Anti-Rabbit (Agilent/Dako #K4003) | Alexa Fluor™ 488 Tyramide Reagent, # B40953, Life Technologies | Cyan | Bond Research Detection System (Leica #DS9455) |  |  |
