# Supplementary material for: Immune Responses Vary in Preinvasive Colorectal Lesions by Tumor Location and Histology
Source: Oxford University Press journal article supplement (doi:10.1158/1940-6207.capr-20-0592), 2021-08-02
Supplement: 19406207capr200592-sup-255359_2_supp_7083746_qs9mmm.docx [file 19406207capr200592-sup-255359_2_supp_7083746_qs9mmm.docx]

| **Supplemental Table 2: DCs of immune response markers by clinicopathologic features adjusted for batch only** | | | | | | | |
| --- | --- | --- | --- | --- | --- | --- | --- |
| **Clinicopathologic features** | **CD4** | **Th17 (CD4+RORC+)** | **IFN-**𝛾 | **IL-17A** | **IL-6** | **Mast cell (CD117)** | **NK Ligand** |
| **DC (95% CI)** | **DC (95% CI)** | **DC (95% CI)** | **DC (95% CI)** | **DC (95% CI)** | **DC (95% CI)** | **DC (95% CI)** |
| **Percent of villous component*** |  |  |  |  |  |  |  |
| 0-25% (n = 28) | 107 (71-163) | 82 (52-128) | 2065 (1477-3174) | 348 (252-479) | 1127 (862-1472) | 82 (56-120) | 2052(1413-2979) |
| 26-75% (n = 37) | 102 (71-145) | 83 (57-120) | 1670 (1209-2305) | **273 (208-359)†, 2** | 845 (675-1058) | 59 (43-80) | 1680 (1226-2304) |
| 76%+ (n = 36) | 99 (69-142) | 82 (56-119) | **1196 (846-1690)¶, 1** | **162 (122-215)#, 1** | **614 (485-778)#, 1** | 32 (23-45) | 1477 (1045-2085) |
| **Location*** |  |  |  |  |  |  |  |
| Proximal (n = 30) | 134 (101-176) | 107 (80-143) | 2047 (1567-2672) | 277 (217-353) | 987 (816-1193) | 72 (56-93) | 2143 (1682-2731) |
| Distal (n = 55) | **70 (48-101)**¶, 2 | **54 (36-80)**¶, 2 | **1284 (884-1862)¶, 2** | 227 (165-312) | **787 (608-1019)‡, 2** | 53 (37-74) | **1504 (1082-2091)†, 3** |
| Rectal (n = 16) | **64 (37-109)†, 1** | **55 (31-97)†, 1** | **713 (438-1161)#, 1** | 209 (133-327) | **456 (322-646)†, 1** | 13 (8-21) | **428 (272-674)#, 1** |
| **Dysplasia*** |  |  |  |  |  |  |  |
| Not-High (n = 58) | 95 (68-132) | 84 (63-112) | 1865 (1009 - 1856) | 262 (207 - 331) | 891 (732 - 1084) | 68 (52 - 89) | 1819 (1397-2369) |
| High grade (n = 43) | 108 (80-142) | 79 (57-112) | 1369 (1420 - 2449) | 247 (190 - 321) | 776 (624 - 965) | **40 (29 - 68)#** | 1585 (1175 -2140) |

* DCs adjusted for batch only. P-values associated with specific comparisons include % villous (10-25% vs. 76%+, 20-25% vs. 26-76%+, 326-75% vs. 76%+ ), location (1proximal vs. rectal, 2proximal vs. distal, 3distal vs. rectal), and dysplasia (non-high vs. high)  #P < 0.0001, †P < 0.001, ‡P < 0.01, ¶P < 0.05
