# Supplementary material for: Immune Responses Vary in Preinvasive Colorectal Lesions by Tumor Location and Histology
Source: Oxford University Press journal article supplement (doi:10.1158/1940-6207.capr-20-0592), 2021-08-02
Supplement: 19406207capr200592-sup-255359_2_supp_7083747_qs9yyy.docx [file 19406207capr200592-sup-255359_2_supp_7083747_qs9yyy.docx]

**Supplemental Table 3: Density counts of immune response markers by features by histologic type adjusted for age, sex, race, and batch and p-values for contrasts**

| **Histology*** | **CD4** | **Th17 (CD4+RORC+)** | **IFN-**𝛾 | **IL-17A** | **IL-6** | **Mast Cells (CD117)** | **NK Ligand (MICA/B)** |
| --- | --- | --- | --- | --- | --- | --- | --- |
| Serrated Lesion (n = 7) | 151 (66-346) | 65 (28-151) | 2397 (1045-5497) | 442 (206-947) | 944 (544-1638) | 74 (34-162) | 3712 (1736-7936) |
| Tubular Adenoma (n = 21) | 90 (54-151) | 73 (44-123) | 2016 (1284-3166) | 284 (194-415) | 1222 (892-1673) | 85 (55-132) | 1636 (1051-2547) |
| Tubulovillous Adenoma (n = 37) | 94 (66-134) | 77 (54-111) | 1552 (1132-2127) | 282 (215-372) | 848 (681-1056) | 54 (40-73) | 1614 (1188-2194) |
| Villous Adenoma (n = 35) | 113 (78-164) | 95 (65-139) | 1239 (880-1746) | 177 (132-237) | 605 (477-768) | 34 (25-48) | 1481 (1053-2082) |
|  |  |  |  |  |  |  |  |
| Serrated vs TA | 0.3131 | 0.8085 | 0.73 | 0.3181 | 0.4386 | 0.7653 | 0.0757 |
| Serrated vs TVA | 0.296 | 0.7052 | 0.3287 | 0.2812 | 0.7228 | 0.4531 | **0.045** |
| Serrated vs VA | 0.539 | 0.427 | 0.1564 | **0.031** | 0.153 | 0.0878 | **0.0314** |
| TA vs TVA | 0.9043 | 0.8758 | 0.3635 | 0.9839 | 0.0629 | 0.0975 | 0.9623 |
| TA vs VA | 0.494 | 0.4298 | 0.0835 | 0.0551 | **0.0004** | **0.0013** | 0.727 |
| TVA vs VA | 0.484 | 0.4397 | 0.3533 | **0.0214** | **0.0433** | **0.0472** | 0.7133 |

* DCs adjusted for age, sex, race, and batch. P-values for each comparison of means were determined from Wald tests. P-values associated with specific comparisons include serrated vs. TA, TVA, VA; TA vs. TVA, VA, and TVA vs. VA. Significant p-value are bolded.
