# Supplementary material for: Immune Responses Vary in Preinvasive Colorectal Lesions by Tumor Location and Histology
Source: Oxford University Press journal article supplement (doi:10.1158/1940-6207.capr-20-0592), 2021-08-02
Supplement: 19406207capr200592-sup-255359_2_supp_7102864_qsp615.docx [file 19406207capr200592-sup-255359_2_supp_7102864_qsp615.docx]

**Figure 1** (supplementary). **Immunofluorescence (IF) stain and digital image for CD4, Th17 (CD4+RORC+) cells.** Panel A) Original duplex image with CD4 (red), RORC (green), and Hoechst nuclear stain (blue). B) CD4 and Hoechst alone. C) RORC and Hoechst alone. D). Software generated image showing CD4+RORC+ cells (Th17), CD4+ cells and negative cells.

**Figure 2** (supplementary) **IF stain and digital image for mast cells (CD117) and NK cell (MICA/B) ligand.** Immunofluorescence (IF) stain and digital image for. Panel A) Original duplex image with MICA/B (red), CD117 (green), and Hoechst nuclear stain (blue). B) MICA/B and Hoechst alone. C) CD117 and Hoechst alone. D) Software generated image showing MICA/B only, CD117 only, double positive CD117+MICA cells, and negative cells.

**Figure 3** (supplementary) **IF stain and digital images for cytokines IL6, IL17A, IFN-𝛾** Panel A) Original triplex image with IL6 (red), Il17a (green), IFN- 𝛾 (cyan) and Hoechst nuclear stain (blue). B) IL6 and Hoechst. C) IL17a and Hoechst. D) IFN- 𝛾 and Hoechst. E) Software generated image showing IL6+IL17a+IFN- 𝛾, IL6+IFN- 𝛾, IL17a+IFN- 𝛾, and no co-expression.
